# Supplementary material for: Metabonomic-Transcriptome Integration Analysis on Osteoarthritis and Rheumatoid Arthritis
Source: Int J Genomics. 2020 Jan 2;2020:5925126. doi: 10.1155/2020/5925126 (PMC6961787; doi:10.1155/2020/5925126)
Supplement: Supplementary Materials — The obtained DEG-metabolite interactions with P < 0.001. [file 5925126.f1.xls]

## Sheet: DEGs-metabolites interactions
metab	gene	OA_cor	RA_cor	diff.corr	Pval
nacetylaminoacid_29	HHAT	-0.952381	0.833333	1.78571	1.12e-06
asparagine_54	GYG1	0.904762	-0.857143	-1.7619	0.000377486
unknown_129	ULK3	0.857143	-0.904762	-1.7619	0.000339589
malonate_64	BCR	0.761905	-0.952381	-1.71429	0.000583171
glucose_70	HHAT	-0.904762	0.809524	1.71429	0.000933555
unknown_129	ITGA6	-0.833333	0.880952	1.71429	1.74e-05
glucoseglutamineglycerol_119	MRPS6	-0.857143	0.833333	1.69048	0.000676007
unknown_138	ACTA1	-0.857143	0.833333	1.69048	0.000102602
xanthine_166	SLC25A39	0.952381	-0.738095	-1.69048	0.000525347
histidine_165	ZBTB16	-0.857143	0.809524	1.66667	5.8e-05
malonate_64	IMPAD1	0.642857	-1	-1.64286	4.96e-05
unknown_130	TRAF3IP3	0.666667	-0.97619	-1.64286	7.78e-05
oxypurinol_167	ACTA1	0.880952	-0.761905	-1.64286	0.000940418
malonate_64	SPINT1-AS1	-0.690476	0.928571	1.61905	0.000409932
alanine_18	TMED8	0.809524	-0.809524	-1.61905	0.000644703
malonate_64	EIPR1	0.809524	-0.809524	-1.61905	0.000807908
pyruvate_39	PTPN11	0.857143	-0.738095	-1.59524	0.00071704
lysine_23	TEX2	0.761905	-0.833333	-1.59524	0.000986748
pyruvate_39	GRPEL1	0.880952	-0.714286	-1.59524	0.000248953
malonate_64	ATP5B	0.666667	-0.928571	-1.59524	6.72e-05
glycerol_96	WDR97	0.833333	-0.761905	-1.59524	0.000172251
alanine_18	IL1RAP	0.952381	-0.619048	-1.57143	0.000103455
pyruvate_39	YWHAE	0.904762	-0.666667	-1.57143	8.52e-05
glycerol_94	LOC100506446	-0.785714	0.785714	1.57143	0.000731915
unknown_137	ACTA1	-0.619048	0.952381	1.57143	0.00042516
adenosine_170	PARVB	0.833333	-0.738095	-1.57143	0.000506412
ethanol3hydroxybutyrate_12	ZHX2	0.809524	-0.738095	-1.54762	2.58e-05
ornithine_25	STAMBPL1	0.97619	-0.571429	-1.54762	0.000316157
unknown_51	STAMBPL1	0.97619	-0.571429	-1.54762	1.65e-05
histidinephenylalanine_65	SNAPC4	-0.595238	0.952381	1.54762	0.000589844
snglycero3phosphocholine_69	PXK	0.738095	-0.809524	-1.54762	0.000647377
glucoseglycerolalanine_120	NECAP2	-0.761905	0.785714	1.54762	0.000734362
guanidoacetate_125	ACER3	0.928571	-0.619048	-1.54762	0.000539154
unknown_128	CYMP	-0.547619	1	1.54762	4.31e-05
alanine_18	ACER3	0.833333	-0.690476	-1.52381	0.000632816
citrate_43	ITGA2B	-0.571429	0.952381	1.52381	0.000806632
tyrosine_159	FEZ2	0.642857	-0.880952	-1.52381	0.000239384
unknown_160	ZHX2	0.619048	-0.904762	-1.52381	2.79e-06
histidine_165	ARFGEF1	-0.785714	0.738095	1.52381	0.000412974
oxypurinol_167	DEF6	-0.809524	0.714286	1.52381	0.000283216
malonate_64	TMEM209	0.595238	-0.904762	-1.5	0.000370786
histidinephenylalanine_65	DAPP1	-0.595238	0.904762	1.5	0.000981829
glutamine_32	CDYL2	0.714286	-0.785714	-1.5	0.000524781
malonate_64	AGPAT2	0.714286	-0.785714	-1.5	0.000801396
taurine_72	CHP1	0.785714	-0.714286	-1.5	0.000660263
lysine_23	IL1RAP	0.619048	-0.857143	-1.47619	0.000837638
unknown_51	BRD8	0.833333	-0.642857	-1.47619	0.000793977
alanine_18	TEX2	0.714286	-0.761905	-1.47619	0.000131867
acetoacetate_35	LOC102723831	-0.595238	0.880952	1.47619	0.000119989
adenosine_170	FTSJ1	0.595238	-0.880952	-1.47619	9.02e-05
unknown_33	TRAF3IP3	-0.714286	0.738095	1.45238	6.84e-06
malonate_64	LINC00621	0.595238	-0.857143	-1.45238	1.24e-05
histidinephenylalanine_65	LINC00621	0.642857	-0.809524	-1.45238	1.8e-05
unknown_129	RAB17	-0.619048	0.833333	1.45238	0.000110898
histidine_157	GYG1	0.761905	-0.690476	-1.45238	0.000842399
unknown_34	FEZ2	0.571429	-0.857143	-1.42857	6.6e-05
asparagine_54	ZDHHC14	-0.761905	0.666667	1.42857	0.000841039
malonate_64	DDX54	0.690476	-0.738095	-1.42857	0.000660158
malonate_64	LINC00467	0.452381	-0.952381	-1.40476	0.00066962
histidine_157	FPR2	0.52381	-0.880952	-1.40476	0.000985595
unknown_138	CITED1	-0.404762	1	1.40476	0.000310678
leucine_5	ZNF785	-0.690476	0.690476	1.38095	0.000727804
malonate_64	APH1A	0.642857	-0.738095	-1.38095	0.000772576
ethanol_13	ZHX2	0.761905	-0.619048	-1.38095	0.000105377
unknown_52	LDLR	-0.785714	0.595238	1.38095	0.000425135
glucoseglycerol_118	ZNF609	-0.5	0.880952	1.38095	0.000107377
unknown_147	TRIOBP	-0.880952	0.5	1.38095	0.000799994
tyrosine_156	ARHGDIB	0.452381	-0.928571	-1.38095	0.000352548
lysine_23	TPCN1	-0.714286	0.642857	1.35714	0.000719253
ophosphocholine_67	LOC101928762	-0.738095	0.619048	1.35714	4.55e-05
myoinositol_75	GNAI3	0.619048	-0.738095	-1.35714	0.000989924
acetoacetate_35	TRAF3	0.52381	-0.833333	-1.35714	0.000780053
malonate_64	COQ5	0.642857	-0.690476	-1.33333	0.000621582
ethanol_13	TUBB2A	-0.357143	0.97619	1.33333	0.000693376
histidinephenylalanine_65	TUBB2A	-0.738095	0.595238	1.33333	0.000952499
valine_102	TUBB2A	-0.547619	0.785714	1.33333	0.000757541
tyrosine_156	CDKN2D	0.738095	-0.595238	-1.33333	0.000462708
histidine_165	TNKS2	-0.619048	0.714286	1.33333	0.000317741
isoleucine_3	TUBB2A	-0.547619	0.761905	1.30952	0.000391278
ethanol3hydroxybutyrate_12	TUBB2A	-0.404762	0.904762	1.30952	0.000250172
valine_36	SPRR1A	-0.666667	0.642857	1.30952	0.000345395
unknown_37	SPRR1A	-0.571429	0.738095	1.30952	0.000362559
ethanol_110	ZHX2	0.761905	-0.547619	-1.30952	7.7e-05
unknown_158	CDIPT-AS1	0.47619	-0.833333	-1.30952	0.000860209
adenosine_170	ZSCAN26	0.785714	-0.52381	-1.30952	0.000967637
mobilelipidisoleucine_26	TICAM1	0.714286	-0.571429	-1.28571	0.000782017
unknown_34	ZHX2	0.619048	-0.666667	-1.28571	2.77e-05
histidinephenylalanine_65	MICALL1	0.357143	-0.928571	-1.28571	4.7e-05
glucose_136	RAB6A	0.547619	-0.738095	-1.28571	0.000689431
adenosine_170	SRP72	0.547619	-0.738095	-1.28571	0.00054113
phenylalanine_161	TUBB2A	-0.52381	0.761905	1.28571	0.000534235
unknown_160	FEZ2	0.619048	-0.642857	-1.2619	0.000368152
formate_171	TBC1D5	0.642857	-0.619048	-1.2619	5.46e-05
histidinephenylalanine_65	CANX	0.5	-0.761905	-1.2619	8.37e-06
tyrosine_159	ZHX2	0.452381	-0.809524	-1.2619	1.34e-05
unknown_128	NFKBIL1	-0.738095	0.5	1.2381	0.000359862
isoleucine_3	DEF6	-0.47619	0.761905	1.2381	0.000656814
tyrosine_59	TUBB2A	-0.52381	0.714286	1.2381	0.000500274
malonate_64	MICALL1	0.404762	-0.833333	-1.2381	0.000218908
unknown_100	TRAF3IP3	-0.261905	0.952381	1.21429	1.17e-05
valine_101	LCN1	0.238095	-0.97619	-1.21429	4.9e-06
glucose_113	TRAF3IP3	0.261905	-0.952381	-1.21429	0.000923968
glucose_114	TRAF3IP3	0.261905	-0.952381	-1.21429	0.000782375
glucose_116	RAB6A	0.5	-0.714286	-1.21429	0.000767127
unknown_153	MFSD4B	-0.52381	0.690476	1.21429	0.00056892
glucose_91	TRAF3IP3	0.238095	-0.952381	-1.19048	0.000818007
unknown_98	MAPK1IP1L	0.357143	-0.833333	-1.19048	0.000922916
guanidoacetate_125	IL1RAP	0.785714	-0.404762	-1.19048	0.000591424
unknown_126	LOC100506446	-0.738095	0.452381	1.19048	0.000724809
unknown_33	TBC1D5	0.5	-0.666667	-1.16667	0.000501896
glucosetaurine_71	RAB6A	0.452381	-0.714286	-1.16667	0.000319991
glucose_93	TRAF3IP3	0.214286	-0.952381	-1.16667	0.000737257
unknown_98	SLC12A2	0.333333	-0.833333	-1.16667	0.000707203
glucose_133	RAB6A	0.452381	-0.714286	-1.16667	0.000371789
glucose_135	TRAF3IP3	0.214286	-0.952381	-1.16667	0.000615624
X2hydroxybutyratepjenylalanineasparagine_142	TP53I11	-0.619048	0.547619	1.16667	0.000254432
phenylalanine_164	FEZ2	0.619048	-0.547619	-1.16667	0.000232085
glycerol_96	TP53I11	-0.761905	0.404762	1.16667	0.000795446
nacetylaminoacid_29	CBFA2T3	-0.452381	0.690476	1.14286	0.000147035
leucine_5	TBC1D5	0.52381	-0.619048	-1.14286	0.000251965
malonate_64	FEZ2	0.428571	-0.714286	-1.14286	0.000421134
glucose_89	RAB6A	0.428571	-0.714286	-1.14286	0.000459126
valine_101	SPRR1A	-0.52381	0.619048	1.14286	0.000415078
glucose_117	RAB6A	0.428571	-0.714286	-1.14286	0.000267109
glucoseunknown_132	RAB6A	0.428571	-0.714286	-1.14286	0.000510064
phenylalanine_161	MICALL1	0.309524	-0.833333	-1.14286	0.000491716
lactate_16	RAB17	0.333333	-0.785714	-1.11905	0.000564091
unknownsugar_86	RAB6A	0.404762	-0.714286	-1.11905	0.000536605
ethanol_108	ZHX2	0.595238	-0.52381	-1.11905	0.000186003
glucose_113	RAB6A	0.404762	-0.714286	-1.11905	0.000528802
glucose_114	RAB6A	0.404762	-0.714286	-1.11905	0.000485282
histidine_165	PICK1	-0.404762	0.714286	1.11905	0.000954823
valine_36	SLC34A1	0.452381	-0.642857	-1.09524	0.000776619
histidinephenylalanine_65	LINC00622	-0.452381	0.642857	1.09524	0.000361937
leucinelysine2hydroxybutyrate_21	ZNF785	-0.404762	0.690476	1.09524	0.00081327
unknown_31	TUBB2A	-0.261905	0.833333	1.09524	7.5e-05
histidinephenylalanine_65	FEZ2	0.380952	-0.714286	-1.09524	5.38e-05
glucose_81	RAB6A	0.380952	-0.714286	-1.09524	0.000337121
unknownsugar_88	DENND4B	0.238095	-0.857143	-1.09524	0.000842055
glucose_89	TRAF3IP3	0.142857	-0.952381	-1.09524	0.000871145
valine_102	TRAF3IP3	-0.333333	0.761905	1.09524	2.52e-05
unknown_103	ZNF324	0.309524	-0.785714	-1.09524	0.000463125
glucoseglutamineglycerol_119	RAB6A	0.47619	-0.619048	-1.09524	0.000956502
unknown_128	EPS8L1	-0.285714	0.809524	1.09524	0.000437015
leucine_20	FEZ2	0.214286	-0.857143	-1.07143	4.11e-05
unknown_41	ZNF793-AS1	0.142857	-0.928571	-1.07143	6.6e-05
taurine_74	KCNC2	-0.619048	0.452381	1.07143	0.000154886
glucose_87	TRAF3IP3	0.119048	-0.952381	-1.07143	0.000889479
unknown_100	LCN1	0.238095	-0.833333	-1.07143	2.83e-05
valine_102	SPRR1A	-0.666667	0.404762	1.07143	0.000735305
unknown_128	REG1CP	-0.309524	0.761905	1.07143	0.000756016
unknown_130	RAB6A	0.333333	-0.738095	-1.07143	0.000952843
unknown_160	SPECC1	-0.404762	0.666667	1.07143	0.000504702
formate_171	TRAF3IP3	-0.357143	0.714286	1.07143	2.74e-05
progln_38	CITED1	0.142857	-0.922172	-1.06503	0.000597494
leucinelysine2hydroxybutyrate_21	SPRR1A	-0.428571	0.619048	1.04762	0.000900497
taurine_78	RAB6A	0.333333	-0.714286	-1.04762	0.000407106
glucose_79	RAB6A	0.333333	-0.714286	-1.04762	0.000525604
glucose_83	RAB6A	0.333333	-0.714286	-1.04762	0.000450223
glucose_83	TRAF3IP3	0.0952381	-0.952381	-1.04762	0.000931927
glucose_84	RAB6A	0.333333	-0.714286	-1.04762	0.000423965
unknown_98	GPR141	-0.119048	0.928571	1.04762	0.000355957
unknown_98	CLIP3	0.309524	-0.738095	-1.04762	0.00081821
valine_101	TRAF3IP3	-0.142857	0.904762	1.04762	5.7e-06
glucosealanine_122	RAB6A	0.333333	-0.714286	-1.04762	0.000703652
unknown_129	MXRA7	-0.0952381	0.952381	1.04762	1.25e-05
unknown_139	RAB6A	0.333333	-0.714286	-1.04762	0.000385722
formate_171	ZNF785	-0.47619	0.571429	1.04762	0.000866698
lysine_55	LOC101928762	-0.666667	0.380952	1.04762	0.000280206
glucose_73	RAB6A	0.380952	-0.666667	-1.04762	0.000474442
glucose_136	TRAF3IP3	0.0714286	-0.97619	-1.04762	0.000716319
isoleucineleucine_4	FEZ2	0.380952	-0.642857	-1.02381	0.000536952
valine_36	ZHX2	0.309524	-0.714286	-1.02381	0.000152603
glucose_93	RAB6A	0.309524	-0.714286	-1.02381	0.000416534
unknown_100	SPRR1A	-0.190476	0.833333	1.02381	0.000690105
glucoseglycerolalanine_120	RAB6A	0.380952	-0.642857	-1.02381	0.000955793
unknown_124	RAB6A	0.357143	-0.666667	-1.02381	0.000246892
glucose_131	RAB6A	0.309524	-0.714286	-1.02381	0.000245573
glucose_135	RAB6A	0.309524	-0.714286	-1.02381	0.000540053
mobilelipid_152	CBX4	0.880952	-0.142857	-1.02381	0.000928919
lactate_16	TRAF3IP3	-0.047619	0.952381	1	1.47e-05
glucose_77	RAB6A	0.285714	-0.714286	-1	0.000364068
unknown_98	DNASE1	-0.0952381	0.904762	1	0.000746518
unknown_160	TUBB2A	-0.166667	0.833333	1	0.000304781
phenylalanine_161	FEZ2	0.428571	-0.571429	-1	5.33e-05
unknown_34	TRAF3IP3	-0.119048	0.880952	1	8.82e-07
